# Supplementary material
Source: PubMed Central journal article supplement (PMC5021599)
Supplement: NIHMS801882-supplement-Supp_Table_S1.pdf [file NIHMS801882-supplement-Supp_Table_S1.pdf]

**Table S1- List of primer sequences designed for qRT-PCR**

| <b>Locus</b>   | <b>Gene</b>                                                                 | <b>Forward primer 5' - 3'</b> | <b>Reverse primer 5' - 3'</b> |
|----------------|-----------------------------------------------------------------------------|-------------------------------|-------------------------------|
| ACYPI008889-RA | OBP4                                                                        | TGCTCCAGTGCGTCTACAAG          | ATGCCTAACTGCGGATAACG          |
| ACYPI31683-RA  | OBP10                                                                       | GCTTCGACGAGATGTCAATG          | CAACTCGGGATGACTTGCTC          |
| ACYPI009456-RA | Takeout                                                                     | CAATTACCGGTGACGGAGTT          | CGTTTCTTACAACGGGCTTC          |
| ACYPI004942-RA | Interference Hedgehog like                                                  | GGTCCCAGTGAGTCTGTGGT          | AACCGGTTTCCCATTAAGGT          |
| ACYPI085492-RA | Eclosion hormone                                                            | GATGTTGGGTGCCTACTTCG          | GGTGCTACGGAATCGATGTT          |
| ACYPI006350-RA | Nuclear hormone receptor ftz-f1 beta                                        | CAATGTCCTGGGAAGGAGAA          | TTTTGATTCGCTGTCTGCAC          |
| ACYPI001692-RA | Ecdysone receptor                                                           | TCAAGGCTTGCTCAAGTGAA          | GCTGAAAATGGCTGGTTGTT          |
| ACYPI008000-RA | Histone-arginine methyl transferase carmer like                             | GCGCTGGATCAGGGATATTA          | TGTTGAGCCATTGAACTTGC          |
| ACYPI53411-RA  | Pre-pgrs family protein                                                     | AGTTAAAGCCTGCAGGACCA          | GCAATCCGTTTAAAGCCAAA          |
| ACYPI004906-RA | Insulin-like growth factor-binding protein complex acid labile subunit-like | TCTCAAGGCCTGAGGTATT           | TTGTATCTTGTGCCGGTGA           |
| ACYPI39140-RA  | Nose-resistant to flouxetine protein 6 like                                 | TGTC AATCGGAAGACGTTCA         | TCACATCACCTTCCAATCCA          |
| ACYPI080057-RA | Dopamine transporter                                                        | TTGGTGAGGCTATGCAAAAA          | TAACGGGTGTAGCTGGCTTT          |
| ACYPI008480-RA | Mediator of RNAPol ii transcription subunit 27 like (control)               | CAACAAGAGCTTTGGCAAGA          | TGGCAATGTTGGTGAAGAGA          |
