# Supplementary material
Source: PubMed Central journal article supplement (PMC5021599)

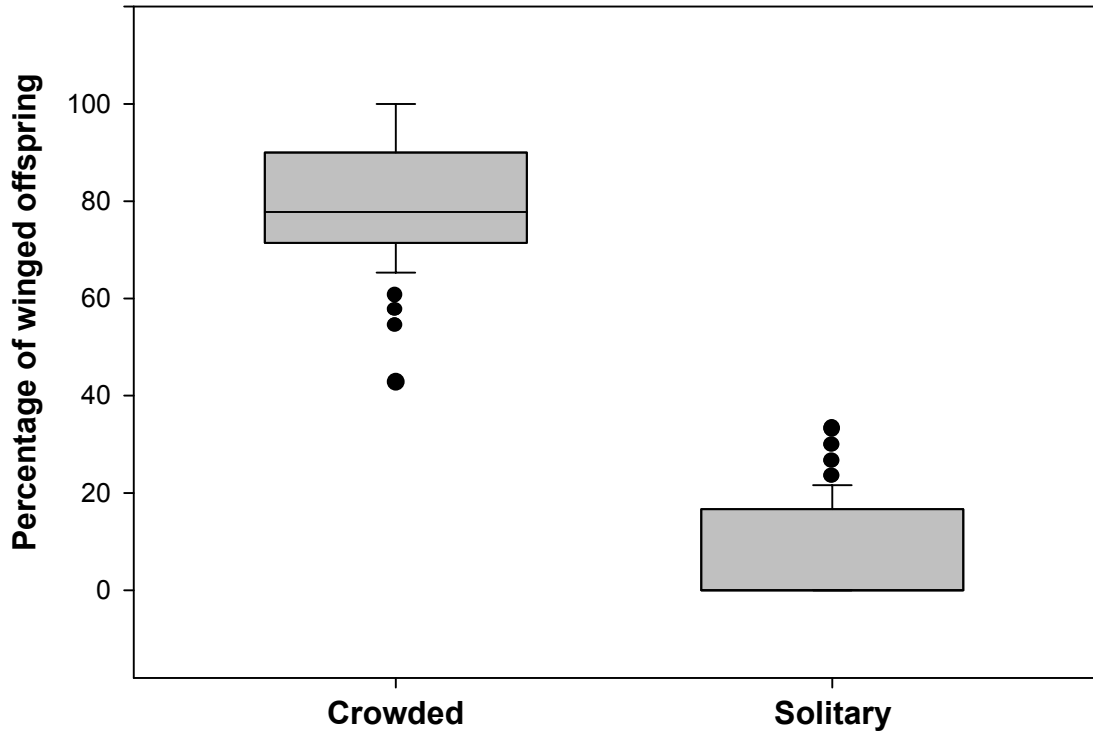

Supplement: NIHMS801882-supplement-Supp_Fig_S1.pdf [file NIHMS801882-supplement-Supp_Fig_S1.pdf]

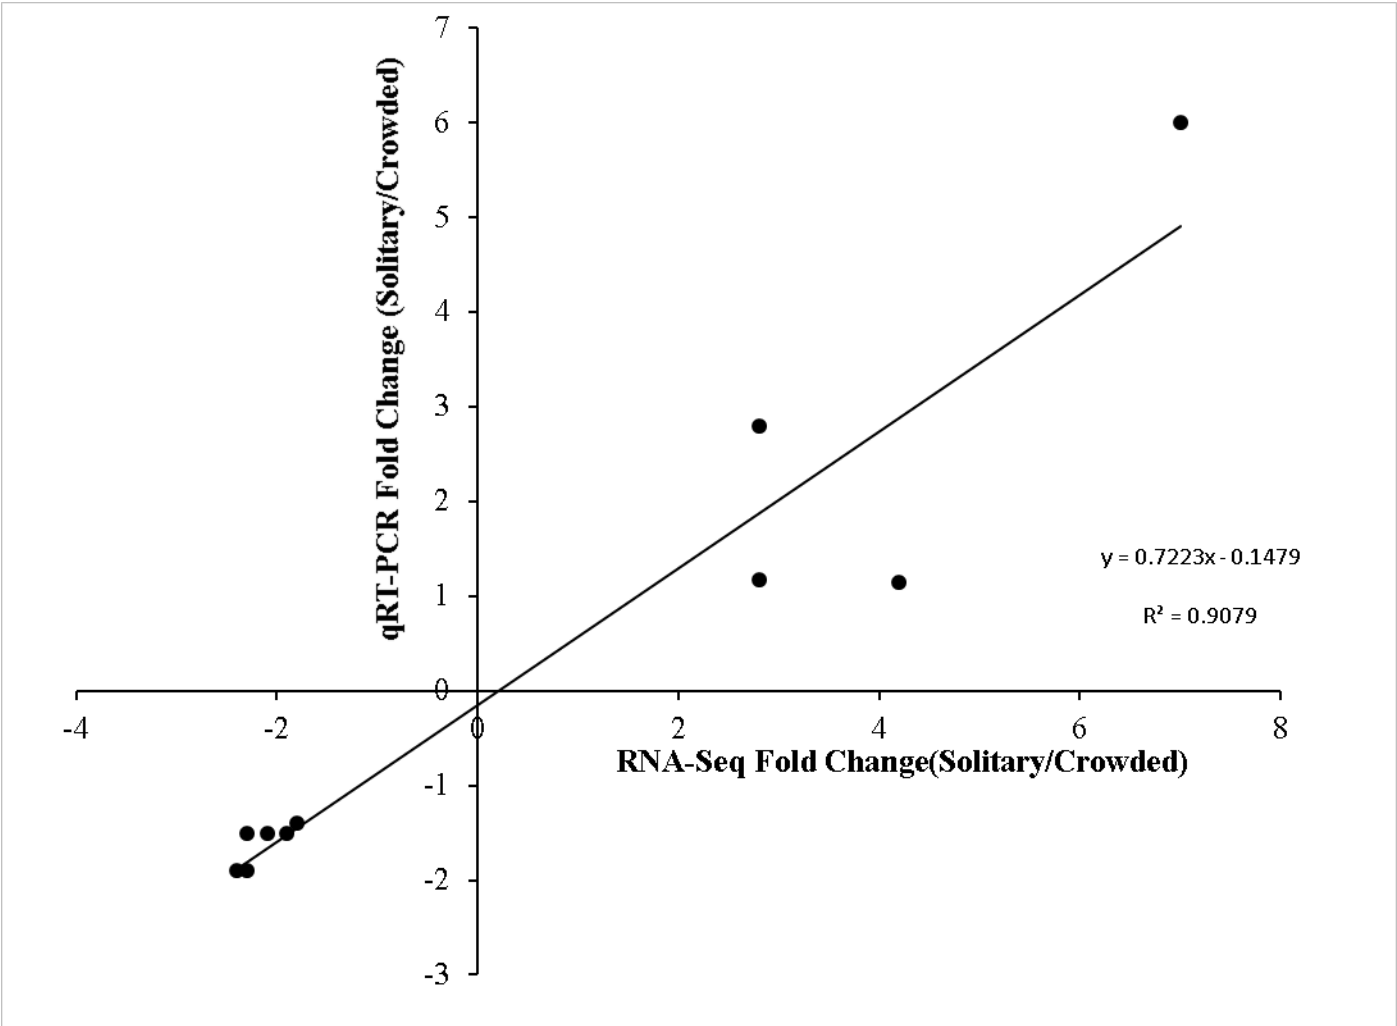

Supplement: NIHMS801882-supplement-Supp_Fig_S2.pdf [file NIHMS801882-supplement-Supp_Fig_S2.pdf]

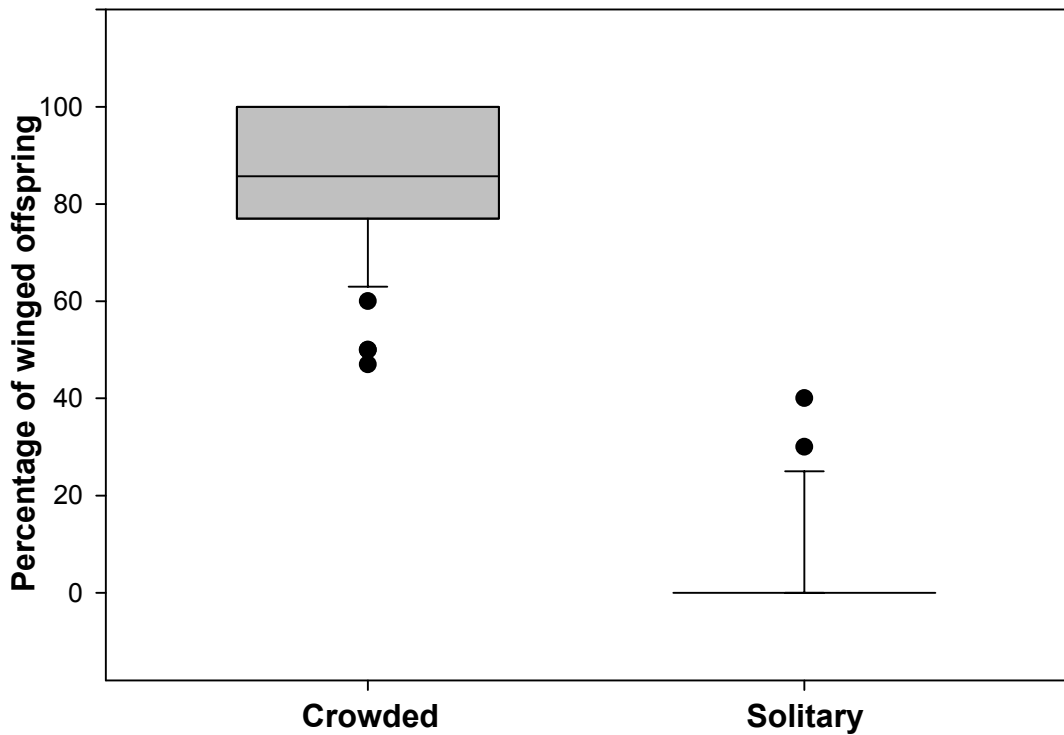

Supplement: NIHMS801882-supplement-Supp_Fig_S3.pdf [file NIHMS801882-supplement-Supp_Fig_S3.pdf]
